# Supplementary material for: Test performance and predictors of accuracy of endoscopic ultrasound-guided fine-needle aspiration for diagnosing biliary strictures or masses
Source: PubMed Central journal article supplement — Endosc Int Open. 2020 Oct 21;8(11):E1537–44. doi: 10.1055/a-1231-4948 (PMC7577792; doi:10.1055/a-1231-4948), 2020-10-21

## Supplementary material

**Supplemental Table 1: Cytology Score  $\geq 4$  threshold data by patient group – non-PSC patients only**

| Non-PSC patients | Stent |      | No stent |      |
|------------------|-------|------|----------|------|
|                  | Sens  | NPV  | Sens     | NPV  |
| <b>Hilar</b>     | 0.78  | 0.50 | 0.91     | 0.50 |
| <b>Non-hilar</b> | 0.76  | 0.75 | 0.95     | 0.92 |

PSC = Primary Sclerosing Cholangitis

Sens = Sensitivity

NPV = Negative Predictive Value

## Supplementary material

Supplemental Figure 1: EUS images showing A) generalised reaction surrounding in-situ bile duct stent B) FNA with stent

A)

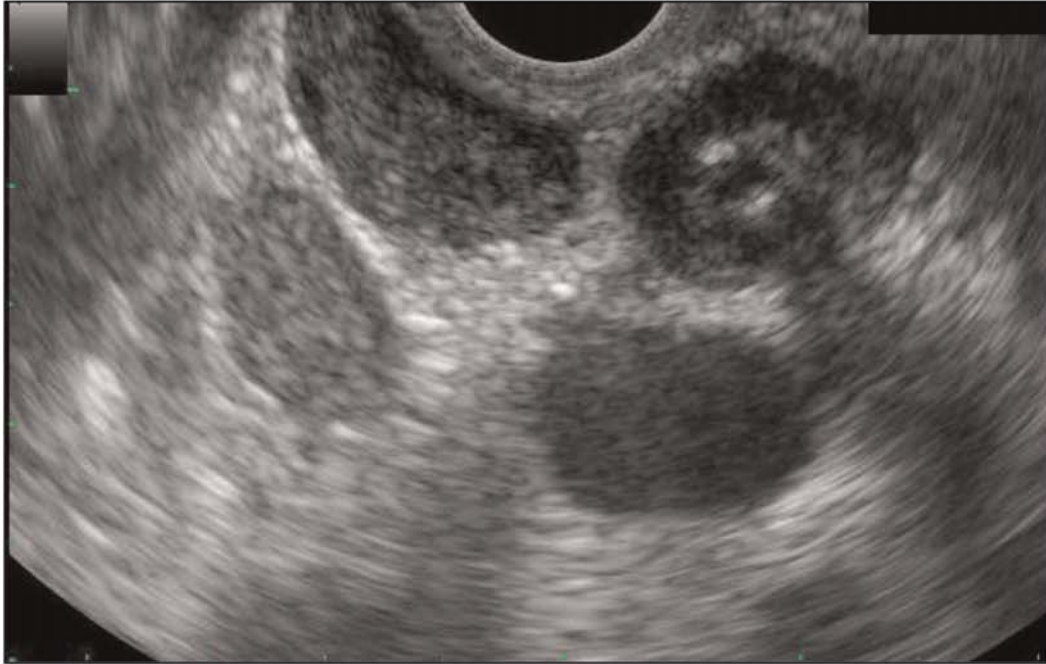

B)

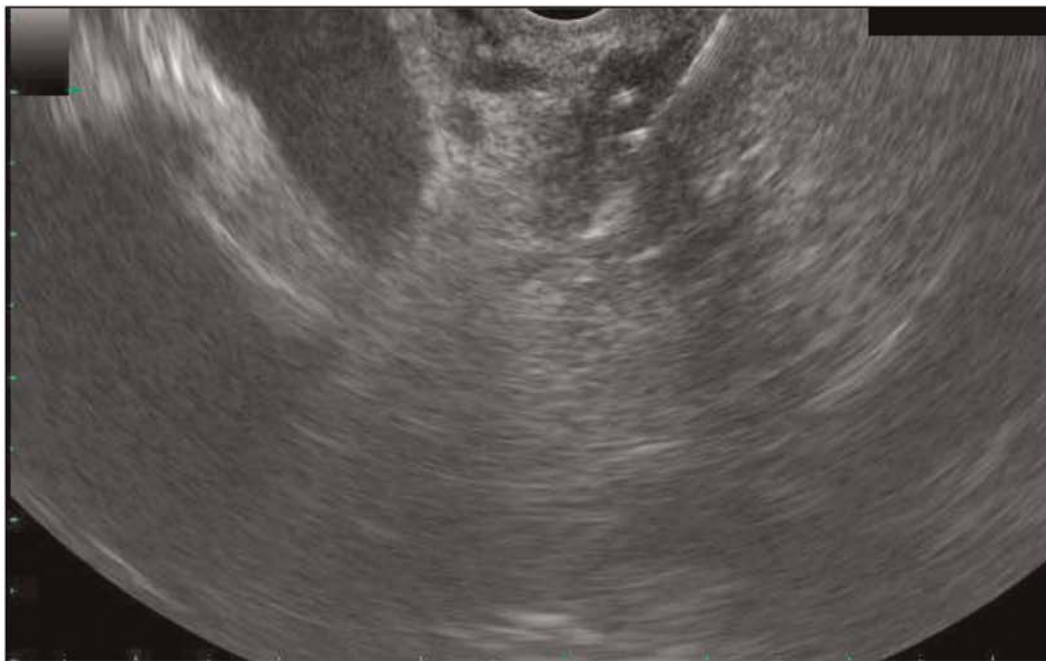

Supplement: 1829supmat_10-1055-a-1231-4948.pdf [file 1829supmat_10-1055-a-1231-4948.pdf]
